# Supplementary material
Source: MDPI journal article supplement (https://www.mdpi.com/2504-446X/8/3/113)
Supplement: s1 [file s1]

Archive with 1 entries (1 files):
- drones-2876611-supplementary.pdf
